# Supplementary material for: Spin canting and slow magnetic relaxation in mononuclear cobalt(ii) sulfadiazine ternary complexes
Source: Royal Society of Chemistry journal article supplement (doi:10.1039/d3dt02359a), 2024-01-01
Supplement: d3dt02359a1.pdf [file d3dt02359a1.pdf]

Supporting Information for:

## **Spin Canting and Slow Magnetic Relaxation in Mononuclear Cobalt(II) Sulfadiazine Ternary Complexes**

Cristian Villa-Pérez,<sup>\*a</sup> Andoni Zabala-Lekuona,<sup>\*b</sup> Iñigo J. Vitorica-Yrezabal,<sup>c</sup> José Manuel Seco,<sup>b</sup> Javier Cepeda,<sup>b</sup> Gustavo Alberto Echeverría<sup>d</sup> and Delia Beatriz Soria<sup>\*a</sup>

<sup>a</sup>CEQUINOR (CONICET, CCT – La Plata), Departamento de Química, Facultad de Ciencias Exactas, Universidad Nacional de la Plata, Bv. 120 n° 1465 (1900), La Plata, Argentina.

<sup>b</sup>Departamento de Química Aplicada, Facultad de Química, Universidad del País Vasco/Euskal Herriko Unibertsitatea (UPV/EHU), Paseo Manuel Lardizabal n°3, 20018, Donostia, Spain.

<sup>c</sup>Departamento de Química Inorgánica, Facultad de Ciencias, Universidad de Granada, 18071, Granada, Spain.

<sup>d</sup>IPLP (CONICET, CCT – La Plata), Departamento de Física, Facultad de Ciencias Exactas, Universidad Nacional de la Plata, 47 y 115 (1900), La Plata, Argentina.

Contents:

- S1. Crystallographic tables
- S2. Powder X-ray diffraction analysis
- S3. Continuous Shape Measurements (CShM)
- S4. Crystal structure: selected bond lengths and angles and additional figures
- S5. Theoretical calculations
- S6. Static magnetic properties of **3**
- S7. Dynamic magnetic properties

# S1. Crystallographic tables

Table S1.- Crystal data and structure refinement for the complexes.

| Complex                                                                      | 1                                                                               | 2                                                                   | 3                                                                   |
|------------------------------------------------------------------------------|---------------------------------------------------------------------------------|---------------------------------------------------------------------|---------------------------------------------------------------------|
| <b>Formula</b>                                                               | CoC <sub>32</sub> H <sub>26</sub> N <sub>10</sub> O <sub>4</sub> S <sub>2</sub> | CoC <sub>28</sub> H <sub>21</sub> N <sub>6</sub> O <sub>2</sub> SCl | NiC <sub>28</sub> H <sub>21</sub> N <sub>6</sub> O <sub>2</sub> SCl |
| <b>Molecular Weight</b> [g mol <sup>-1</sup> ]                               | 737.68                                                                          | 599.96                                                              | 599.73                                                              |
| <b>Temperature</b> [K]                                                       | 298(2)                                                                          | 298(2)                                                              | 232(2)                                                              |
| <b>Wavelength</b> $\lambda$ [Å]                                              | 0.71073 (Mo K $\alpha$ )                                                        | 0.71073 (Mo K $\alpha$ )                                            | 0.71073 (Mo K $\alpha$ )                                            |
| <b>Crystal system</b>                                                        | <i>P ca2</i> <sub>1</sub>                                                       | <i>P 2</i> <sub>1</sub> / <i>n</i>                                  | <i>P 2</i> <sub>1</sub> / <i>n</i>                                  |
| <b>Space group</b>                                                           | Orthorhombic                                                                    | Monoclinic                                                          | Monoclinic                                                          |
| <b>a</b> [Å]                                                                 | 11.1595(7)                                                                      | 9.2829(6)                                                           | 9.1866(3)                                                           |
| <b>b</b> [Å]                                                                 | 17.8542(11)                                                                     | 28.894(2)                                                           | 28.6498(10)                                                         |
| <b>c</b> [Å]                                                                 | 16.0849(8)                                                                      | 10.1698(9)                                                          | 10.0473(4)                                                          |
| <b><math>\beta</math></b> [°]                                                |                                                                                 | 99.487(7)                                                           | 99.955(4)                                                           |
| <b>Volume</b> [Å <sup>3</sup> ]                                              | 3204.8(3)                                                                       | 2690.5(4)                                                           | 2604.58(17)                                                         |
| <b>Z, Density (calculated)</b> [g cm <sup>-3</sup> ]                         | 4, 1.5294                                                                       | 4, 1.4817                                                           | 4, 1.529                                                            |
| <b>Absorption coefficient</b> $\mu$ [mm <sup>-1</sup> ]                      | 0.722                                                                           | 0.853                                                               | 0.967                                                               |
| <b>F (000)</b>                                                               | 1516                                                                            | 1228                                                                | 1232                                                                |
| <b><math>\theta</math> - range</b> [°]                                       | 3.185 - 28.824                                                                  | 2.93 - 26.00                                                        | 2.177 - 30.009                                                      |
| <b>Index ranges</b>                                                          | -13 ≤ h ≤ 12<br>-13 ≤ k ≤ 23<br>-20 ≤ l ≤ 20                                    | -11 ≤ h ≤ 11<br>-35 ≤ k ≤ 35<br>-8 ≤ l ≤ 12                         | -11 ≤ h ≤ 12<br>-38 ≤ k ≤ 38<br>-13 ≤ l ≤ 13                        |
| <b>Collected reflections/independent/R<sub>int</sub></b>                     | 10260 / 6048 / 0.0403                                                           | 13041 / 5288 / 0.0763                                               | 23391 / 6403 / 0.0535                                               |
| <b>Completeness to <math>\theta_{\text{máx}}</math></b>                      | 0.997 ( $\theta = 25.242$ )                                                     | 0.998 ( $\theta = 25.242$ )                                         | 1 ( $\theta = 25.242$ )                                             |
| <b>Absorption correction</b>                                                 |                                                                                 | Semi-empirical from equivalents                                     |                                                                     |
| <b>Refinement model</b>                                                      |                                                                                 | Full-matrix least squares on F <sup>2</sup>                         |                                                                     |
| <b>Data/Restraints/Parameters</b>                                            | 6048 / 7 / 454                                                                  | 5288 / 3 / 358                                                      | 6403 / 0 / 352                                                      |
| <b>Goodness on fit (F<sup>2</sup>)</b>                                       | 1.047                                                                           | 1.024                                                               | 1.057                                                               |
| <b>R<sub>1</sub> indexes</b> <sup>1</sup>                                    | 0.0523 (0.0927)                                                                 | 0.0710 (0.1606)                                                     | 0.0810 (0.0451)                                                     |
| <b>wR<sub>2</sub> indexes (I &gt; 2<math>\sigma</math> (I))</b> <sup>2</sup> | 0.0884 (0.1054)                                                                 | 0.1236 (0.1576)                                                     | 0.09654 (0.1068)                                                    |
| <b>Highest peak/hole difference</b> [e Å <sup>-3</sup> ]                     | 0.328 / -0.266                                                                  | 0.793 / -0.320                                                      | 0.368 / -0.423                                                      |

$$^1R_1 = \Sigma ||F_0| - |F_c|| / \Sigma |F_0|. \quad ^2wR_2 = [\Sigma w(|F_0|^2 - |F_c|^2)^2 / \Sigma w(|F_0|^2)^2]^{1/2}.$$

## S2. Powder X-ray diffraction analysis

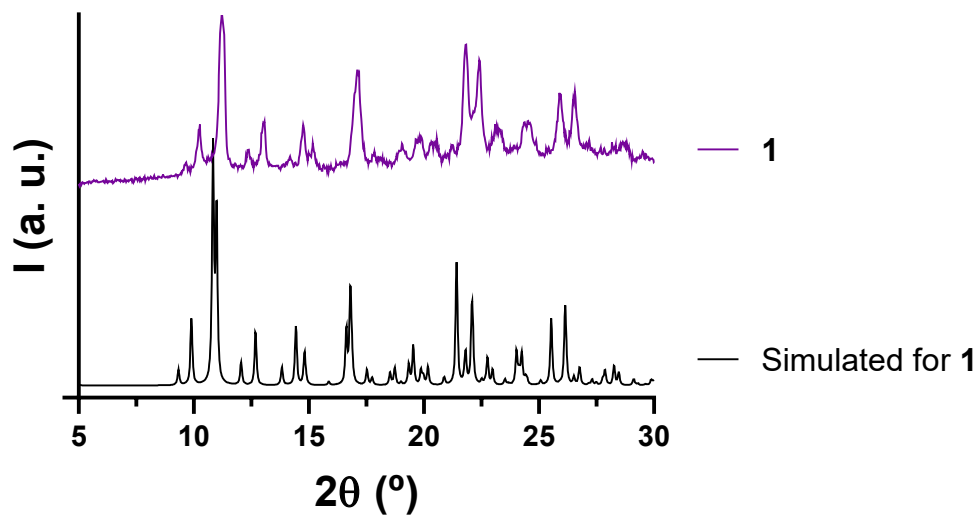

**Figure S1.-** For compound **1**, simulated pattern from single-crystal X-ray diffraction (black) and experimental XRPD (purple).

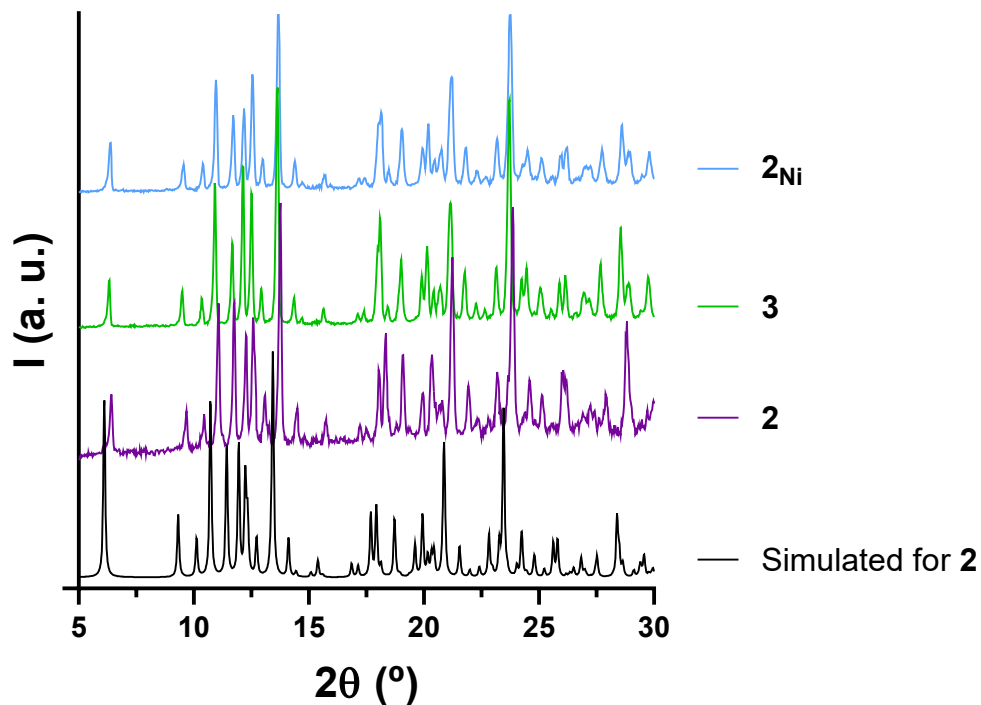

**Figure S2.-** For compound **2**, **3** and **2<sub>Ni</sub>**, simulated pattern from single-crystal X-ray diffraction (black) and experimental XRPD for **2** (purple), **3** (green) and **2<sub>Ni</sub>** (blue).

### S3. Continuous Shape Measurements (CShM)

The closer the values to zero, the better-defined geometry

**Table S2.-** Continuous Shape Measures Calculations for Complex 1.

| HP-6   | PPY-6  | OC-6  | TPR-6  | JPPY-6 |
|--------|--------|-------|--------|--------|
| 23.848 | 23.814 | 4.464 | 13.784 | 27.542 |

HP-6: Hexagon ( $D_{6h}$ ); PPY-6: Pentagonal pyramid ( $C_{5v}$ ); OC-6: Octahedron ( $O_h$ ); TPR-6: Trigonal prism ( $D_{3h}$ ); JPPY-6: Johnson pentagonal pyramid - J2 ( $C_{5v}$ ).

**Table S3.-** Continuous Shape Measures Calculations for Complex 2.

| PP-5   | vOC-5 | TBPY-5 | SPY-5 | JTBPY-5 |
|--------|-------|--------|-------|---------|
| 25.850 | 4.500 | 9.133  | 3.950 | 10.144  |

PP-5: Pentagon ( $D_{5h}$ ); vOC-5: Vacant octahedron ( $C_{4v}$ ); TBPY-5: Trigonal bipyramid ( $D_{3h}$ ); SPY-5: Square pyramid ( $C_{4v}$ ); JTBPY-5: Johnson trigonal bipyramid – J12 ( $D_{3h}$ ).

## S4. Crystal structure: selected bond lengths and angles and additional figures

**Table S4.-** Selected bond lengths [Å] and angles [°].

| <b>Compound 1</b>                      |            |                                         |           |
|----------------------------------------|------------|-----------------------------------------|-----------|
| Co – N <sub>16</sub>                   | 2.1934(1)  | N <sub>16</sub> – Co – N <sub>31</sub>  | 168.08(1) |
| Co – N <sub>17</sub>                   | 2.1058(1)  | N <sub>16</sub> – Co – N <sub>312</sub> | 100.22(1) |
| Co – N <sub>26</sub>                   | 2.0943(1)  | N <sub>17</sub> – Co – N <sub>26</sub>  | 96.76(1)  |
| Co – N <sub>27</sub>                   | 2.2761(1)  | N <sub>17</sub> – Co – N <sub>27</sub>  | 154.62(1) |
| Co – N <sub>31</sub>                   | 2.1131(1)  | N <sub>17</sub> – Co – N <sub>31</sub>  | 106.04(1) |
| Co – N <sub>312</sub>                  | 2.1018(1)  | N <sub>17</sub> – Co – N <sub>312</sub> | 102.27(1) |
| N <sub>17</sub> – S <sub>18</sub>      | 1.5977(1)  | N <sub>26</sub> – Co – N <sub>27</sub>  | 60.88(1)  |
| N <sub>27</sub> – S <sub>28</sub>      | 1.6046(1)  | N <sub>26</sub> – Co – N <sub>31</sub>  | 94.21(1)  |
|                                        |            | N <sub>26</sub> – Co – N <sub>312</sub> | 160.83(1) |
| N <sub>16</sub> – Co – N <sub>17</sub> | 62.48(1)   | N <sub>27</sub> – Co – N <sub>31</sub>  | 88.57(1)  |
| N <sub>16</sub> – Co – N <sub>26</sub> | 90.55(1)   | N <sub>27</sub> – Co – N <sub>312</sub> | 100.92(1) |
| N <sub>16</sub> – Co – N <sub>27</sub> | 103.28(1)  | N <sub>31</sub> – Co – N <sub>312</sub> | 78.41(1)  |
| <b>Compound 2</b>                      |            |                                         |           |
| Co – Cl <sub>1</sub>                   | 2.2746(2)  | Cl <sub>1</sub> – Co – N <sub>16</sub>  | 99.43(1)  |
| Co – N <sub>16</sub>                   | 2.1166(2)  | Cl <sub>1</sub> – Co – N <sub>17</sub>  | 154.15(1) |
| Co – N <sub>17</sub>                   | 2.14735(2) | Cl <sub>1</sub> – Co – N <sub>21</sub>  | 99.40(1)  |
| Co – N <sub>21</sub>                   | 2.0611(2)  | Cl <sub>1</sub> – Co – N <sub>220</sub> | 107.14(1) |
| Co – N <sub>220</sub>                  | 2.0393(2)  | N <sub>16</sub> – Co – N <sub>17</sub>  | 61.87(1)  |
| N <sub>17</sub> – S <sub>18</sub>      | 1.6141(1)  | N <sub>16</sub> – Co – N <sub>21</sub>  | 147.63(1) |
|                                        |            | N <sub>16</sub> – Co – N <sub>220</sub> | 119.01(1) |
|                                        |            | N <sub>17</sub> – Co – N <sub>21</sub>  | 90.98(1)  |
|                                        |            | N <sub>17</sub> – Co – N <sub>220</sub> | 97.95(1)  |
|                                        |            | N <sub>21</sub> – Co – N <sub>220</sub> | 79.67(1)  |
| <b>Compound 3</b>                      |            |                                         |           |
| Ni – Cl <sub>03</sub>                  | 2.2780(7)  | Cl <sub>03</sub> – Ni – N <sub>21</sub> | 98.33(6)  |
| Ni – N <sub>21</sub>                   | 1.999(2)   | Cl <sub>03</sub> – Ni – N <sub>17</sub> | 155.20(6) |
| Ni – N <sub>17</sub>                   | 2.101(2)   | Cl <sub>03</sub> – Ni – N <sub>22</sub> | 103.35(6) |
| Ni – N <sub>22</sub>                   | 1.999(2)   | Cl <sub>03</sub> – Ni – N <sub>11</sub> | 97.66(6)  |
| Ni – N <sub>11</sub>                   | 2.095(2)   | N <sub>21</sub> – Ni – N <sub>17</sub>  | 93.92(8)  |
| N <sub>17</sub> – S <sub>18</sub>      | 1.617(2)   | N <sub>21</sub> – Ni – N <sub>22</sub>  | 81.25(9)  |
|                                        |            | N <sub>21</sub> – Ni – N <sub>11</sub>  | 152.67(8) |
|                                        |            | N <sub>22</sub> – Ni – N <sub>17</sub>  | 99.76(8)  |
|                                        |            | N <sub>11</sub> – Ni – N <sub>11</sub>  | 116.20(9) |
|                                        |            | N <sub>11</sub> – Ni – N <sub>17</sub>  | 63.63(8)  |

**Table S5.-** Intra and Intermolecular Hydrogen bonds in complexes **1-3** [ $\text{\AA}$ ,  $^\circ$ ].

| <b>D—H<math>\cdots</math>A</b>                                               | <b>D—H</b> | <b>H<math>\cdots</math>A</b> | <b>D<math>\cdots</math>A</b> | <b><math>\angle</math> D—H<math>\cdots</math>A</b> |
|------------------------------------------------------------------------------|------------|------------------------------|------------------------------|----------------------------------------------------|
| <b>Compound 1</b>                                                            |            |                              |                              |                                                    |
| N <sub>117</sub> —H <sub>117A</sub> $\cdots$ O <sub>19</sub> <sup>i</sup>    | 0.85       | 2.52                         | 3.130(8)                     | 130                                                |
| N <sub>117</sub> —H <sub>117B</sub> $\cdots$ O <sub>110</sub> <sup>ii</sup>  | 0.85       | 2.23                         | 3.054(8)                     | 162                                                |
| N <sub>217</sub> —H <sub>217A</sub> $\cdots$ O <sub>210</sub> <sup>iii</sup> | 0.86       | 2.55                         | 3.308(10)                    | 147                                                |
| N <sub>217</sub> —H <sub>217B</sub> $\cdots$ O <sub>29</sub> <sup>iv</sup>   | 0.86       | 2.19                         | 3.039(9)                     | 168                                                |
| C <sub>112</sub> —H <sub>112</sub> $\cdots$ O <sub>110</sub> <sup>v</sup>    | 0.93       | 2.58                         | 3.395(7)                     | 147.2                                              |
| C <sub>213</sub> —H <sub>213</sub> $\cdots$ N <sub>22</sub> <sup>iii</sup>   | 0.93       | 2.59                         | 3.490(9)                     | 163.5                                              |
| <b>Compound 2</b>                                                            |            |                              |                              |                                                    |
| N <sub>117</sub> —H <sub>117A</sub> $\cdots$ O <sub>110</sub> <sup>vi</sup>  | 0.85       | 2.25                         | 2.981(7)                     | 143                                                |
| N <sub>117</sub> —H <sub>117B</sub> $\cdots$ Cl <sub>1</sub> <sup>vii</sup>  | 0.86       | 2.53                         | 3.375(6)                     | 168                                                |
| C <sub>29</sub> —H <sub>29</sub> $\cdots$ Cl <sub>1</sub> <sup>viii</sup>    | 0.93       | 2.88                         | 3.641(8)                     | 140                                                |
| C <sub>28</sub> —H <sub>28</sub> $\cdots$ Cl <sub>1</sub> <sup>ix</sup>      | 0.93       | 2.71                         | 3.566(8)                     | 154                                                |
| <b>Compound 3</b>                                                            |            |                              |                              |                                                    |
| N <sub>117</sub> —H <sub>11B</sub> $\cdots$ O <sub>110</sub> <sup>vi</sup>   | 0.85       | 2.15                         | 2.984(3)                     | 160                                                |
| N <sub>117</sub> —H <sub>117B</sub> $\cdots$ Cl <sub>03</sub> <sup>vii</sup> | 0.86       | 2.51                         | 3.301(3)                     | 150                                                |

**Symmetry codes:** (i) -x, -y+1, z-1/2; (ii) -x+1/2, y, z-1/2; (iii) -x+3/2, y, z-1/2; (iv) -x+1, -y+2, z-1/2; (v) x-1/2, -y+1, z; (vi) x-1/2, -y+1/2, z-1/2; (vii) x-1/2, -y+1/2, z+1/2; (viii) -x, -y, -z; (ix) x-1, y, z.

**Table S6.-** Structural parameters ( $\text{\AA}$ ,  $^\circ$ ) of  $\pi$ - $\pi$  interactions of compound **2**.<sup>a</sup>

| Ring...Ring <sup>b</sup> | $\alpha$ | DC       | $\beta$ | DZ       | Dist.     |
|--------------------------|----------|----------|---------|----------|-----------|
| 1A-2A(i)                 | 3.6(3)   | 3.573(4) | 15.8    | 3.485(3) | 3.53-3.69 |
| 2A-1A(i)                 | 3.6(3)   | 3.574(4) | 12.7    | 3.439(3) | 3.51-3.63 |
| 3A-3A(ii)                | 0.0(4)   | 3.696(5) | 21.4    | 3.441(3) | 3.45-3.71 |

[a] Symmetry: (i)  $-x + 1, -y, -z$ ; (ii)  $-x + 1, -y, -z + 1$ .  $\alpha$ : dihedral angle between mean planes of the rings ( $^\circ$ ), DC: distance between ring centroids ( $\text{\AA}$ ),  $\beta$ : angle between DC vector and normal to plane(I) ( $^\circ$ ), DZ: perpendicular distance of the centroids of ring(I) on plane of ring(II) ( $\text{\AA}$ ), Dist.: shorter distances between non-hydrogen atoms of rings (I) and (II). [b] Rings: **1A**: N21, C118, C211, C212, C213, C218; **2A**: N22, C23, C28, C29, C119, C210; **3A**: C23, C24, C25, C26, C27, C28.

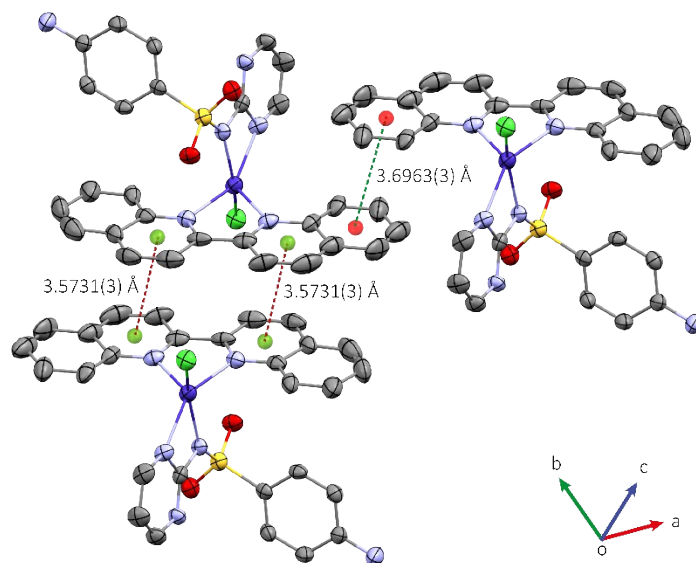**Figure S3.-**  $\pi$ -Stacking motifs in complex **2**.

## S5. Theoretical calculations

**Table S7.** NEVPT2 results calculated on the H-optimized structures of compounds **1** and **2** showing the most significant contributions to  $D$ ,  $E/D$ ,  $g$ -tensor and energy-separation between Kramers (KD) doublets.

| Compound                                                                      | 1                    | 2                    |
|-------------------------------------------------------------------------------|----------------------|----------------------|
| $D$ ( $D_{\text{KD1-2}}$ , $D_{\text{KD1-3}}$ ) <sup>a</sup> $\text{cm}^{-1}$ | +70.1 (+31.1, +25.4) | -59.4 (-78.5, +14.1) |
| $E/D$                                                                         | 0.08                 | 0.21                 |
| $g_{xx}$ , $g_{yy}$ , $g_{zz}$                                                | 1.95, 2.52, 2.67     | 2.03, 2.29, 2.83     |
| $g_{\text{iso}}$                                                              | 2.38                 | 2.39                 |
| $\Delta E$ (1-2), $\Delta E$ (1-3) $\text{cm}^{-1}$                           | 170, 706             | 151, 878             |

<sup>a</sup> The two values in the parentheses after  $D$  represent the contribution to  $D$  from the ground to first and ground to second excited state transitions, respectively.

**Table S8.** NEVPT2 results calculated on the H-optimized structure of compound **3**, showing the most significant contributions to  $D$ ,  $E/D$ , and  $g$ -tensor.

| Compound                                                                           | 3                    |
|------------------------------------------------------------------------------------|----------------------|
| $D$ ( $D_{\text{1st transition}}$ , $D_{\text{2nd transition}}$ ) $\text{cm}^{-1}$ | -21.5 (-60.4, +22.9) |
| $E/D$                                                                              | 0.22                 |
| $g_{xx}$ , $g_{yy}$ , $g_{zz}$                                                     | 2.18, 2.26, 2.37     |
| $g_{\text{iso}}$                                                                   | 2.27                 |

<sup>a</sup> The two values in the parentheses after  $D$  represent the contribution to  $D$  from the ground to first and ground to second excited state transitions, respectively.



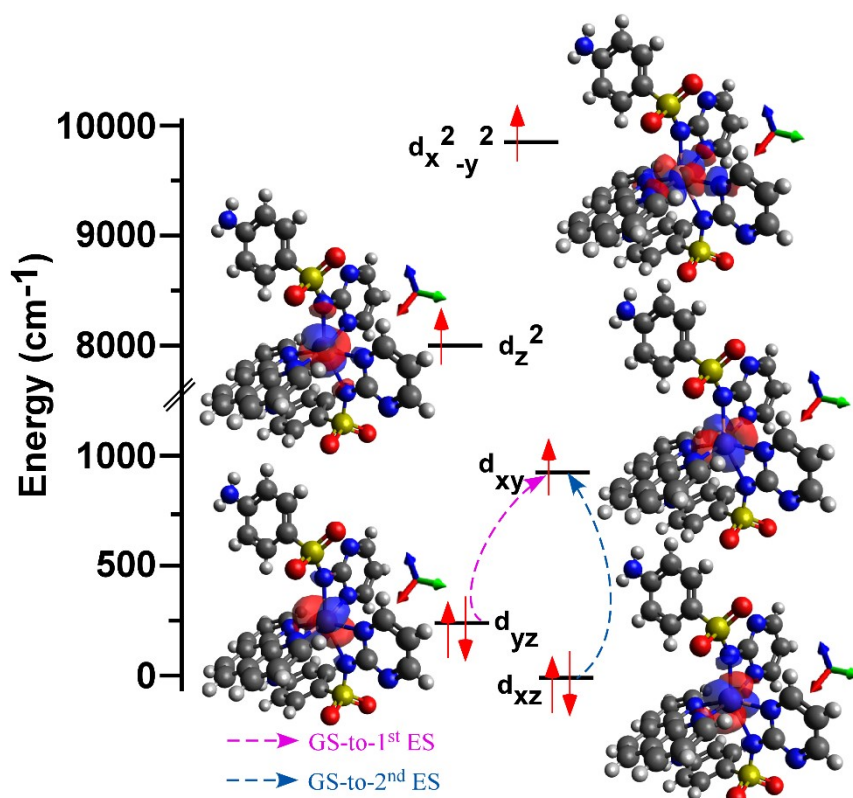

(a)

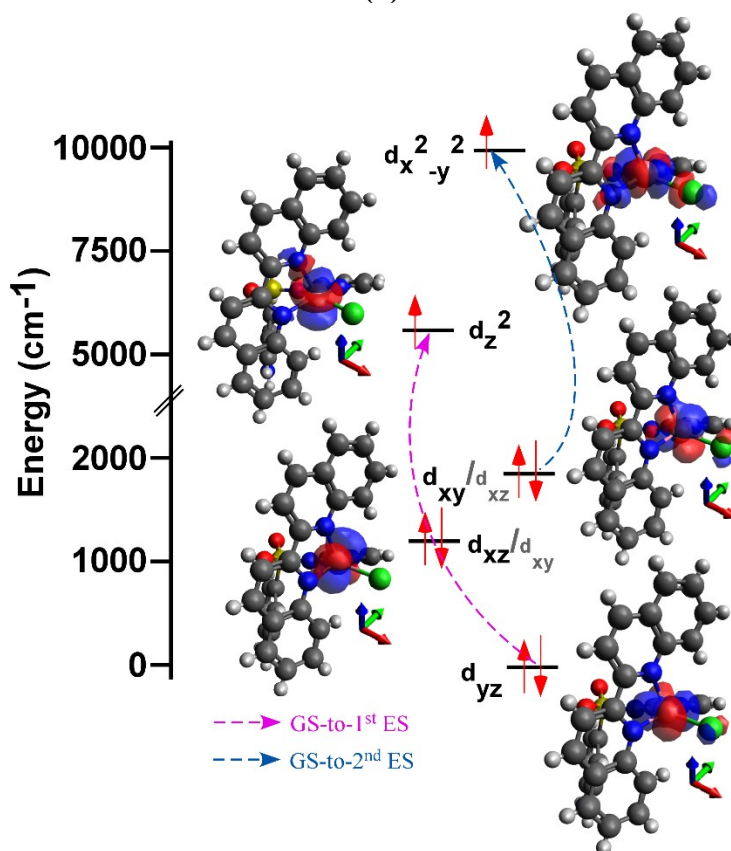

(b)

**Figure S4.-** NEVPT2-AILFT computed d-orbital splitting for compound (a) **1** and (b) **3**. Significant transitions affecting to *zfs* parameters are specified.

**Table S9.** The ligand field one electron eigenfunctions for compounds **1-3** from NEVPT2.

| Compound 1 |             |                            |          |          |          |               |          |
|------------|-------------|----------------------------|----------|----------|----------|---------------|----------|
| Orbital    | Energy (eV) | Energy (cm <sup>-1</sup> ) | $d_z^2$  | $d_{xz}$ | $d_{yz}$ | $d_{x^2-y^2}$ | $d_{xy}$ |
| 1          | 0           | 0                          | -0.38656 | -0.74310 | -0.47033 | -0.17081      | 0.21905  |
| 2          | 0.033       | 262.9                      | -0.47011 | 0.59752  | -0.60925 | -0.11012      | -0.19661 |
| 3          | 0.112       | 902.4                      | -0.01538 | -0.16647 | -0.20768 | 0.90470       | -0.33232 |
| 4          | 0.996       | 8034.0                     | 0.71319  | -0.60305 | -0.24404 | -0.21512      | 0.14782  |
| 5          | 1.223       | 9863.4                     | -0.24674 | -0.10886 | 0.27239  | -0.91387      | -0.13386 |
| Compound 2 |             |                            |          |          |          |               |          |
| Orbital    | Energy (eV) | Energy (cm <sup>-1</sup> ) | $d_z^2$  | $d_{xz}$ | $d_{yz}$ | $d_{x^2-y^2}$ | $d_{xy}$ |
| 1          | 0           | 0                          | 0.09380  | -0.07109 | -0.85873 | 0.37147       | 0.33278  |
| 2          | 0.156       | 1256.7                     | -0.40725 | -0.59236 | -0.20618 | 0.10071       | -0.65621 |
| 3          | 0.242       | 1949.2                     | 0.33728  | 0.59548  | -0.29638 | -0.06215      | -0.66328 |
| 4          | 0.701       | 5656.1                     | -0.84002 | 0.50011  | -0.14555 | -0.11623      | 0.09776  |
| 5          | 1.236       | 9971.6                     | -0.07718 | 0.19835  | 0.33324  | 0.91351       | -0.09566 |
| Compound 3 |             |                            |          |          |          |               |          |
| Orbital    | Energy (eV) | Energy (cm <sup>-1</sup> ) | $d_z^2$  | $d_{xz}$ | $d_{yz}$ | $d_{x^2-y^2}$ | $d_{xy}$ |
| 1          | 0           | 0                          | 0.16725  | -0.00564 | 0.94284  | -0.16172      | -0.23854 |
| 2          | 0.169       | 1367.0                     | -0.34389 | -0.74721 | -0.07256 | 0.07246       | -0.55938 |
| 3          | 0.269       | 2167.3                     | -0.19203 | -0.51020 | 0.25466  | 0.14545       | 0.78537  |
| 4          | 0.762       | 6148.3                     | 0.90320  | -0.39760 | -0.15300 | 0.05230       | 0.00247  |
| 5          | 1.46        | 11773.4                    | 0.03360  | 0.15251  | 0.13241  | 0.97196       | -0.11565 |

**Table S10.** NEVPT2 computed electronic states and their energies (cm<sup>-1</sup>), and the corresponding major electronic configurations. Note that minor contributions are not shown.

| Compound 1    |               |                                                                                                                                                                            |
|---------------|---------------|----------------------------------------------------------------------------------------------------------------------------------------------------------------------------|
| Energy-CASCCF | Energy-NEVPT2 | Electronic configurations from CASSCF                                                                                                                                      |
| 0             | 0             | $d_{xz}^2 d_{yz}^2 d_{xy}^1 d_z^2 d_{x^2-y^2}^1$ (49%)<br>$d_{xz}^2 d_{yz}^1 d_{xy}^2 d_z^2 d_{x^2-y^2}^1$ (25%)                                                           |
| 578.7         | 778.2         | $d_{xz}^2 d_{yz}^1 d_{xy}^2 d_z^2 d_{x^2-y^2}^1$ (50%)<br>$d_{xz}^2 d_{yz}^2 d_{xy}^1 d_z^2 d_{x^2-y^2}^1$ (21%)                                                           |
| 962.4         | 1272.2        | $d_{xz}^1 d_{yz}^2 d_{xy}^2 d_z^2 d_{x^2-y^2}^1$ (35%)<br>$d_{xz}^1 d_{yz}^2 d_{xy}^2 d_z^2 d_{x^2-y^2}^1$ (16%)                                                           |
| 6237.4        | 8299.1        | $d_{xz}^2 d_{yz}^1 d_{xy}^1 d_z^2 d_{x^2-y^2}^1$ (44%)<br>$d_{xz}^1 d_{yz}^2 d_{xy}^1 d_z^2 d_{x^2-y^2}^1$ (26%)                                                           |
| 7718.0        | 8344.3        | $d_{xz}^1 d_{yz}^2 d_{xy}^1 d_z^2 d_{x^2-y^2}^1$ (40%)<br>$d_{xz}^2 d_{yz}^1 d_{xy}^1 d_z^2 d_{x^2-y^2}^2$ (21%)                                                           |
| Compound 2    |               |                                                                                                                                                                            |
| Energy-CASCCF | Energy-NEVPT2 | Electronic configurations from CASSCF                                                                                                                                      |
| 0             | 0             | $d_{yz}^2 d_{xz}^2 d_{xy}^1 d_z^2 d_{x^2-y^2}^1$ (47%)<br>$d_{yz}^2 d_{xz}^1 d_{xy}^2 d_z^2 d_{x^2-y^2}^1$ (13%)<br>$d_{yz}^1 d_{xz}^2 d_{xy}^1 d_z^2 d_{x^2-y^2}^2$ (12%) |
| 663.0         | 908.6         | $d_{yz}^2 d_{xz}^1 d_{xy}^2 d_z^2 d_{x^2-y^2}^1$ (41%)<br>$d_{yz}^1 d_{xz}^2 d_{xy}^1 d_z^2 d_{x^2-y^2}^2$ (27%)                                                           |
| 1971.9        | 2649.9        | $d_{yz}^1 d_{xz}^2 d_{xy}^2 d_z^2 d_{x^2-y^2}^1$ (59%)<br>$d_{yz}^1 d_{xz}^1 d_{xy}^1 d_z^2 d_{x^2-y^2}^2$ (15%)                                                           |
| 4635.3        | 6215.5        | $d_{yz}^2 d_{xz}^1 d_{xy}^1 d_z^2 d_{x^2-y^2}^1$ (49%)<br>$d_{yz}^1 d_{xz}^2 d_{xy}^1 d_z^2 d_{x^2-y^2}^1$ (21%)                                                           |
| 6215.2        | 8314.3        | $d_{yz}^1 d_{xz}^2 d_{xy}^1 d_z^2 d_{x^2-y^2}^1$ (51%)<br>$d_{yz}^1 d_{xz}^2 d_{xy}^2 d_z^2 d_{x^2-y^2}^1$ (19%)                                                           |
| Compound 3    |               |                                                                                                                                                                            |
| Energy-CASCCF | Energy-NEVPT2 | Electronic configurations from CASSCF                                                                                                                                      |
| 0             | 0             | $d_{yz}^2 d_{xz}^2 d_{xy}^2 d_z^2 d_{x^2-y^2}^1$ (57%)                                                                                                                     |

|        |         |                                                        |
|--------|---------|--------------------------------------------------------|
|        |         | $d_{yz}^1 d_{xz}^2 d_{xy}^2 d_z^2 d_{x^2-y^2}^1$ (24%) |
| 4300.3 | 6065.6  | $d_{yz}^1 d_{xz}^2 d_{xy}^2 d_z^2 d_{x^2-y^2}^1$ (51%) |
|        |         | $d_{yz}^1 d_{xz}^2 d_{xy}^1 d_z^2 d_{x^2-y^2}^2$ (19%) |
| 5756.7 | 8065.6  | $d_{yz}^2 d_{xz}^2 d_{xy}^1 d_z^1 d_{x^2-y^2}^2$ (30%) |
|        |         | $d_{yz}^1 d_{xz}^2 d_{xy}^2 d_z^2 d_{x^2-y^2}^1$ (28%) |
|        |         | $d_{yz}^2 d_{xz}^2 d_{xy}^2 d_z^1 d_{x^2-y^2}^1$ (23%) |
| 7879.9 | 11371.6 | $d_{yz}^2 d_{xz}^1 d_{xy}^2 d_z^2 d_{x^2-y^2}^1$ (50%) |
|        |         | $d_{yz}^1 d_{xz}^1 d_{xy}^2 d_z^2 d_{x^2-y^2}^2$ (17%) |
| 9427.0 | 12753.2 | $d_{yz}^1 d_{xz}^1 d_{xy}^2 d_z^2 d_{x^2-y^2}^2$ (45%) |
|        |         | $d_{yz}^2 d_{xz}^1 d_{xy}^1 d_z^2 d_{x^2-y^2}^2$ (23%) |

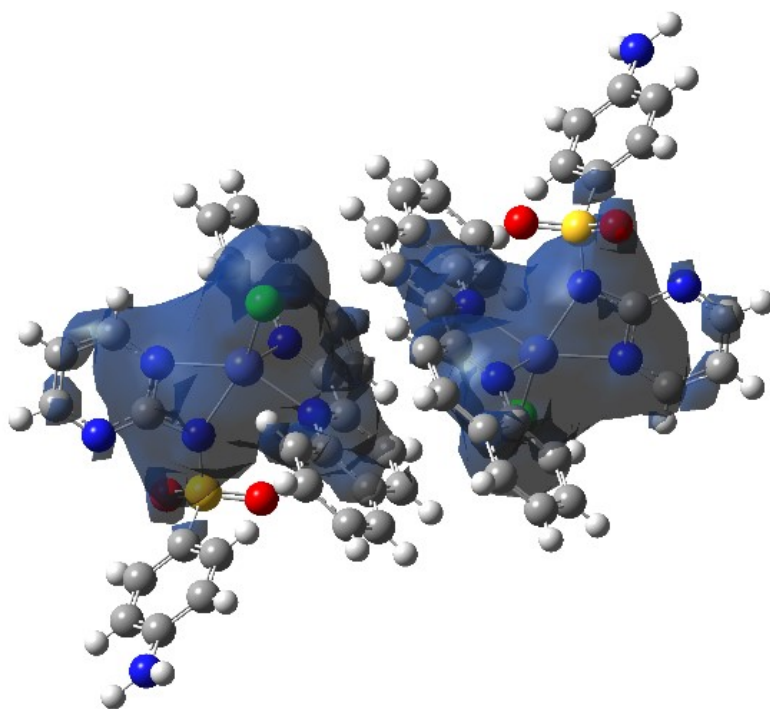

**Figure S5.-** View of the ground state spin density for compound **2**.

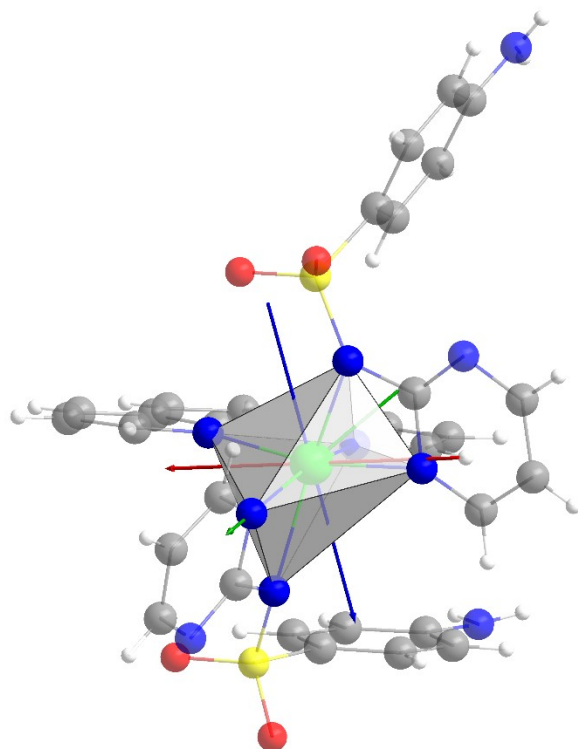

**Figure S6.-** Orientation of the D-tensor components in Co ion of compound **1** obtained from CASSCF/NEVPT2 calculations. The reference axis x, y and z of the *D*-tensor are displayed in red, green and blue, respectively.

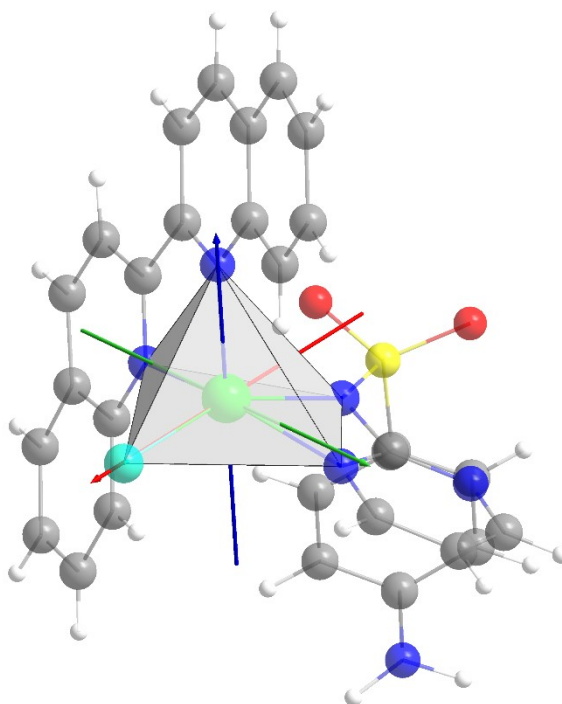

**Figure S7.-** Orientation of the D-tensor components in Co ion of compound **2** obtained from CASSCF/NEVPT2 calculations. The reference axis x, y and z of the *D*-tensor are displayed in red, green and blue, respectively.

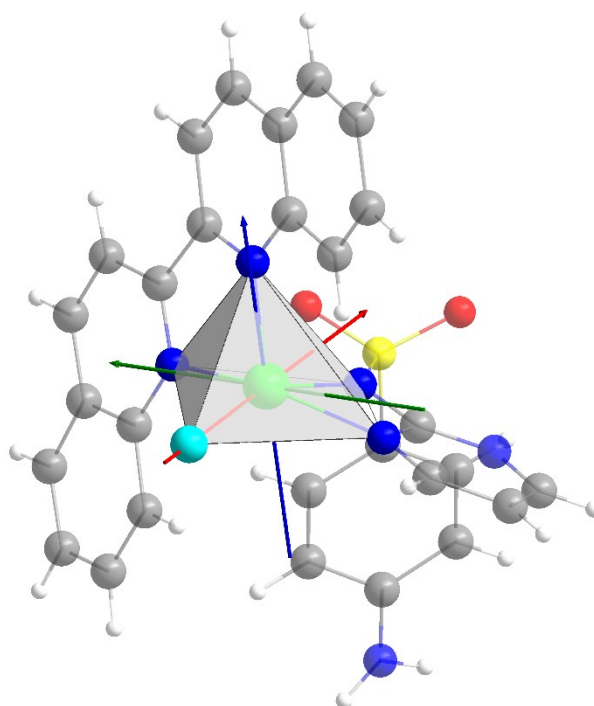

**Figure S8.-** Orientation of the D-tensor components in Co ion of compound **3** obtained from CASSCF/NEVPT2 calculations. The reference axis x, y and z of the *D*-tensor are displayed in red, green and blue, respectively.

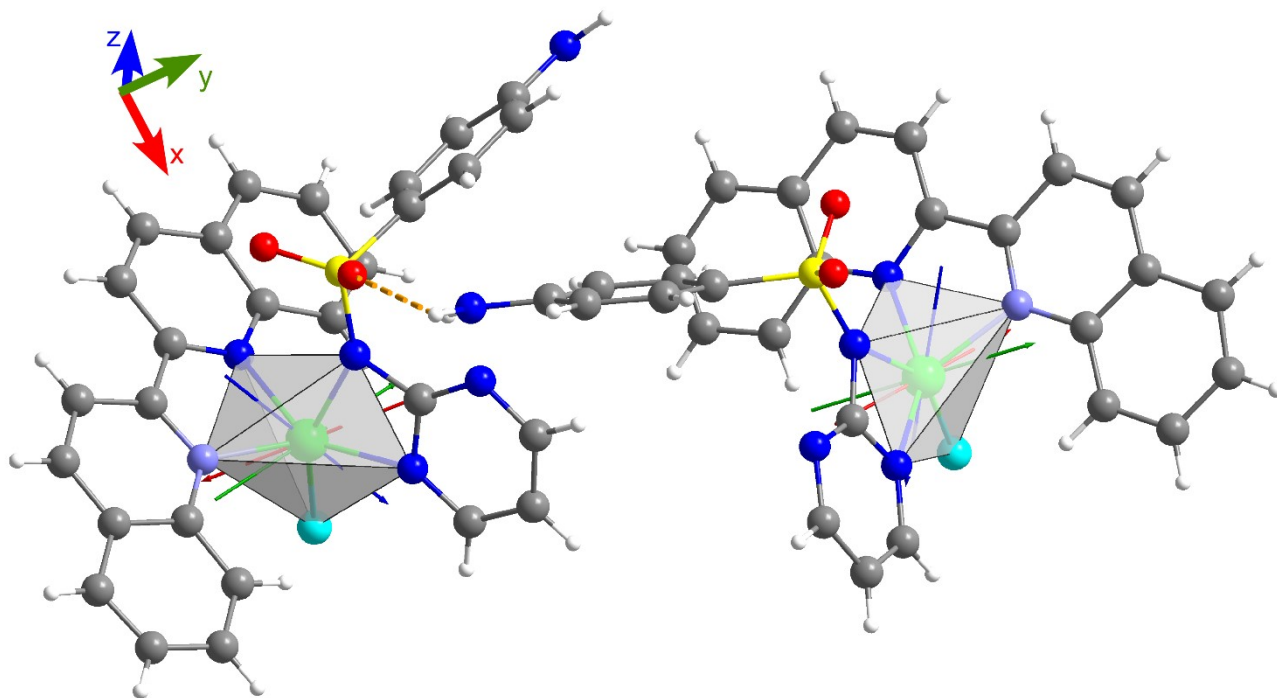

**Figure S9.**- View of the non-symmetric superexchange magnetic pathway showing the  $D$ -tensor for both Co centres for compound **2**. Note also that the N atom occupying the apical position of the distorted square pyramid is shown in purple to help visualizing the non-fully antiparallel orientation between both environments.

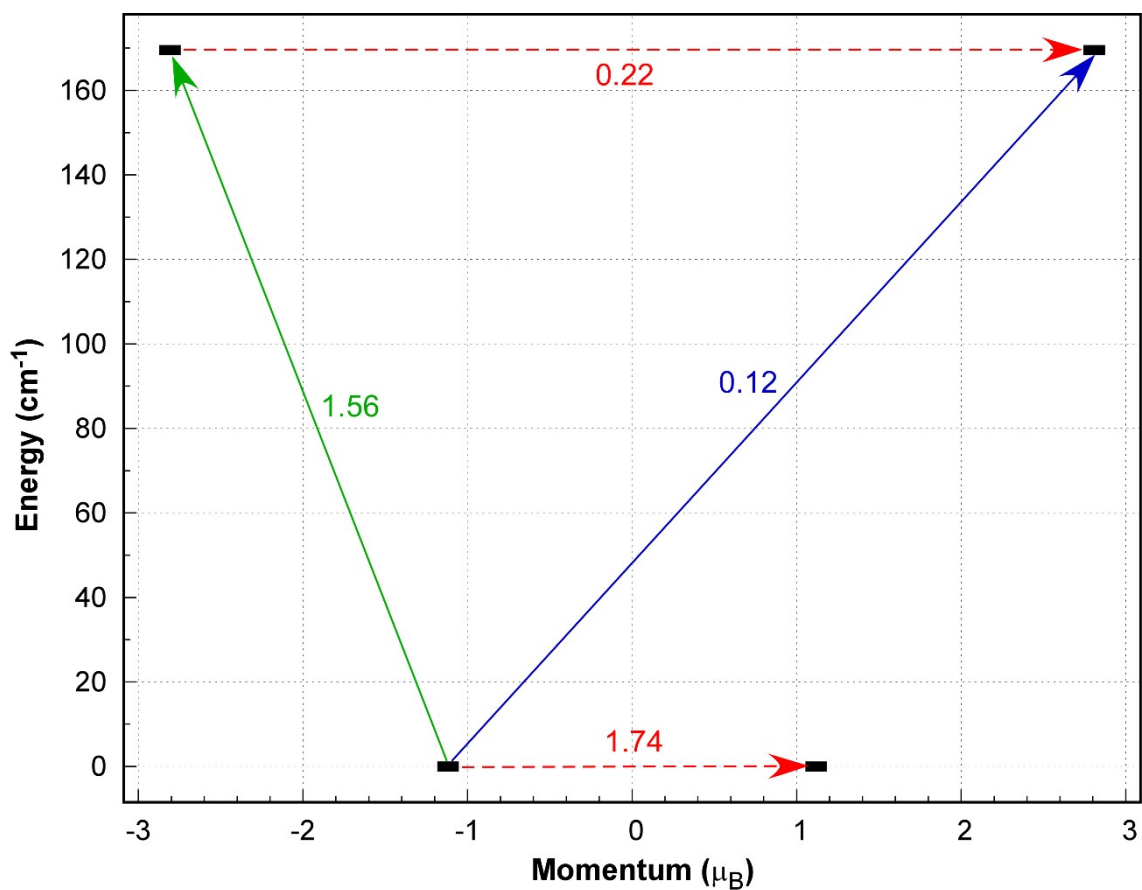

**Figure S10.-** Ab initio computed relaxation mechanism with the two lowest KDs of compound **1**.

Blue and green lines indicate the probable relaxation pathways for magnetization reversal mechanism through excited states. The dotted red lines represents the ground state QTM and TA-QTM (thermally assisted-QTM) via first and second excited KDs. The numbers close to each arrow designate matrix elements of transition magnetic moments.



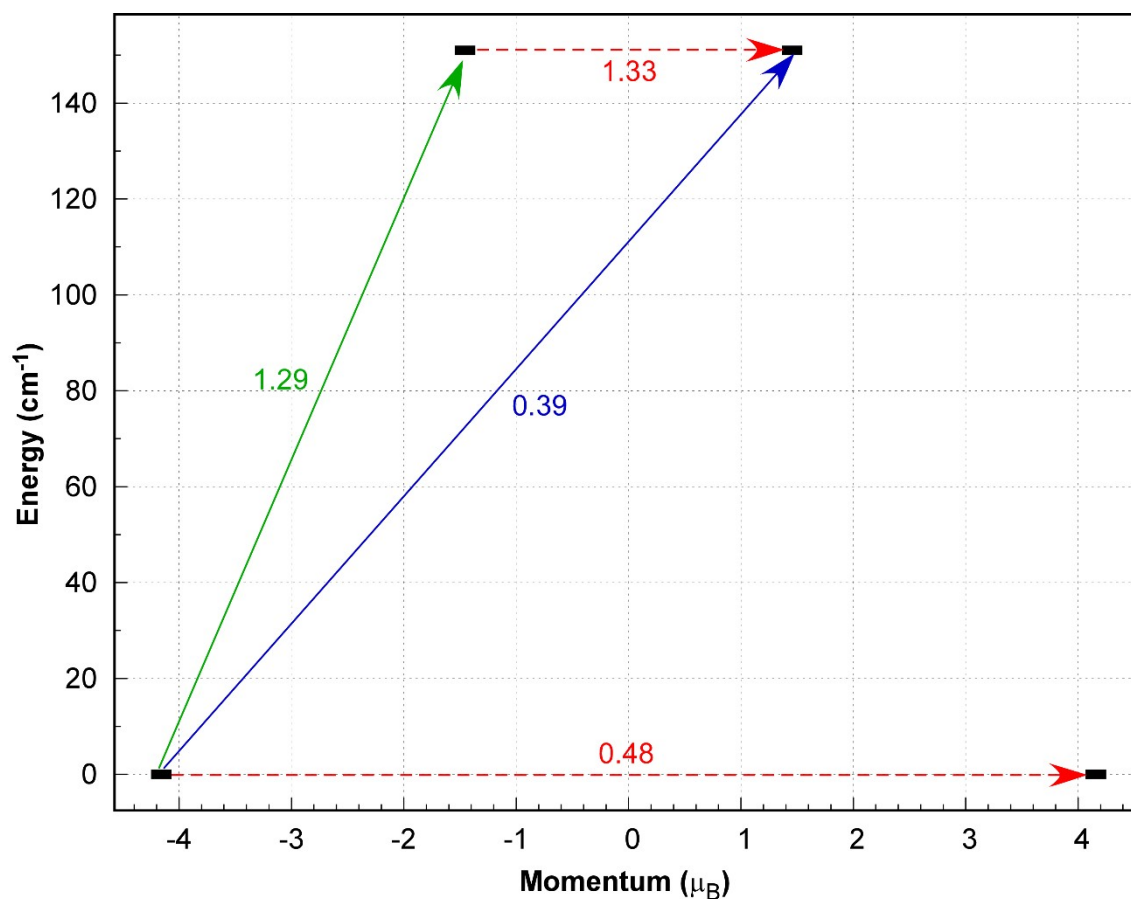

**Figure S11.-** Ab initio computed relaxation mechanism with the two lowest KDs of compound **2**.

Blue and green lines indicate the probable relaxation pathways for magnetization reversal mechanism through excited states. The dotted red lines represents the ground state QTM and TA-QTM (thermally assisted-QTM) via first and second excited KDs. The numbers close to each arrow designate matrix elements of transition magnetic moments.

## S6. Static magnetic properties of **3**

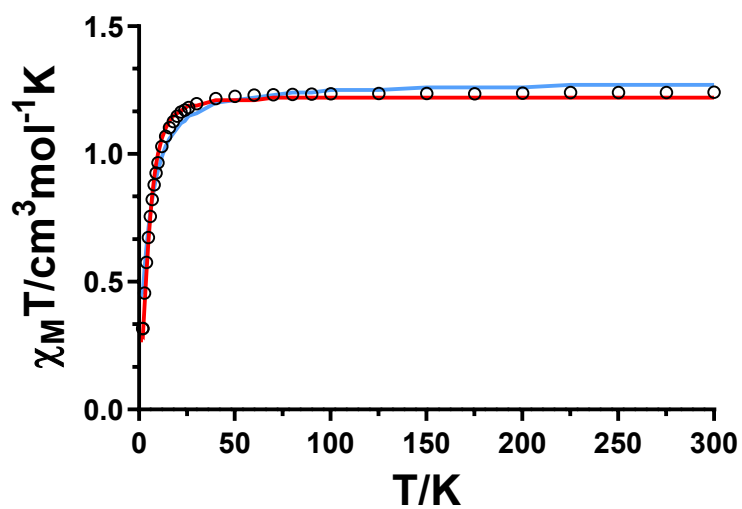

**Figure S12.-** Variable-temperature dc magnetic susceptibility data for **3** collected under a 1 kOe applied dc field. The red fit was obtained by using the positive  $D$  value mentioned in the text, while the blue one corresponds to a negative value in addition to antiferromagnetic intermolecular interactions.

## S7. Dynamic magnetic properties

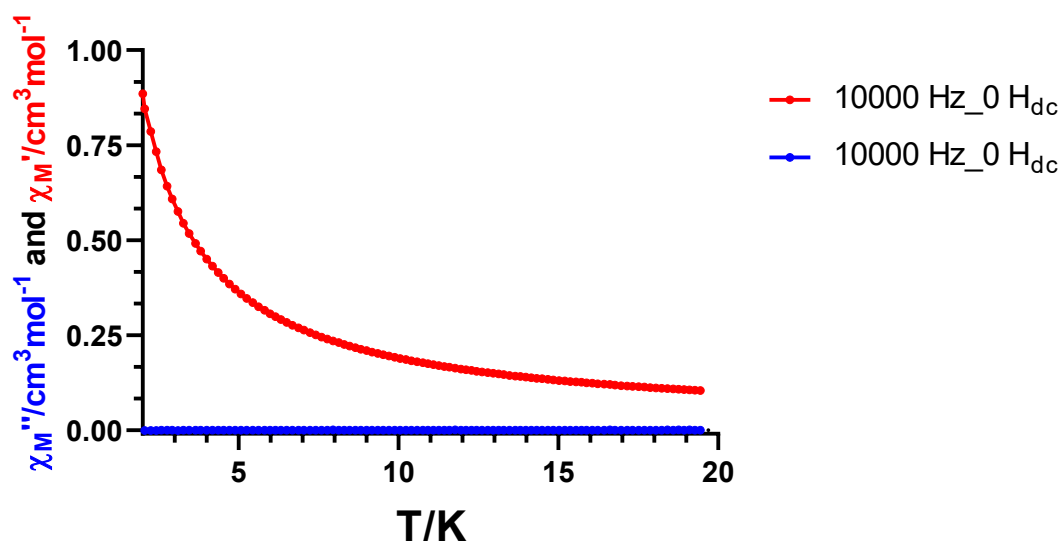

Figure S13.- Temperature dependence of the in phase (red) and out-of-phase (blue) components of the *ac* susceptibility in a zero *dc* applied field for **1**.

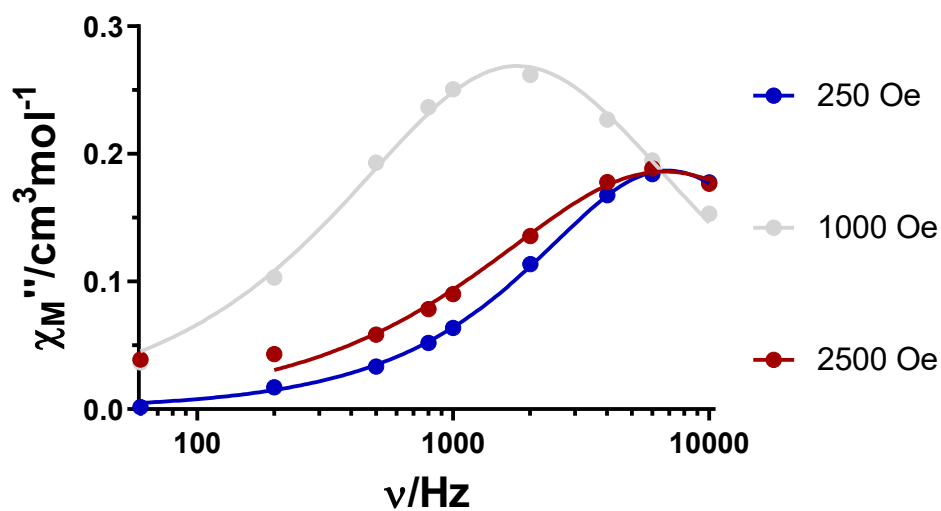

Figure S14.- Field dependence of the out-of-phase signal vs frequency at 2.0 K for **1**.

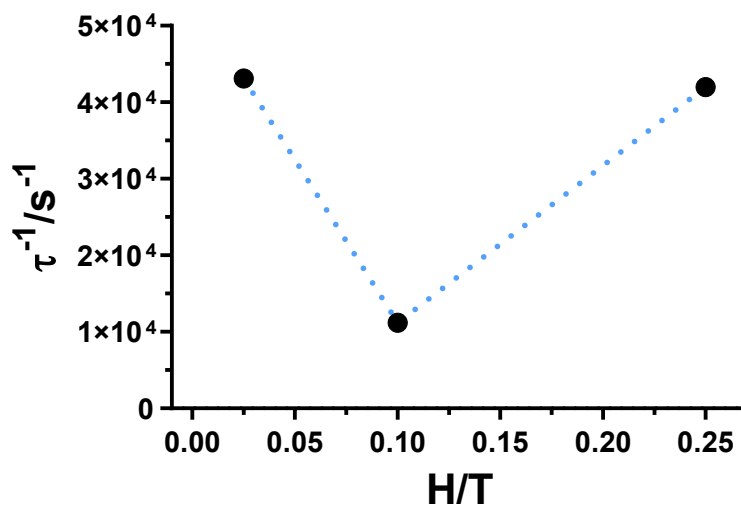

**Figure S15.-** The inverse of the relaxation times obtained at different magnetic fields at 2.0 K for **1**.  
The dashed black is a guide to the eye.

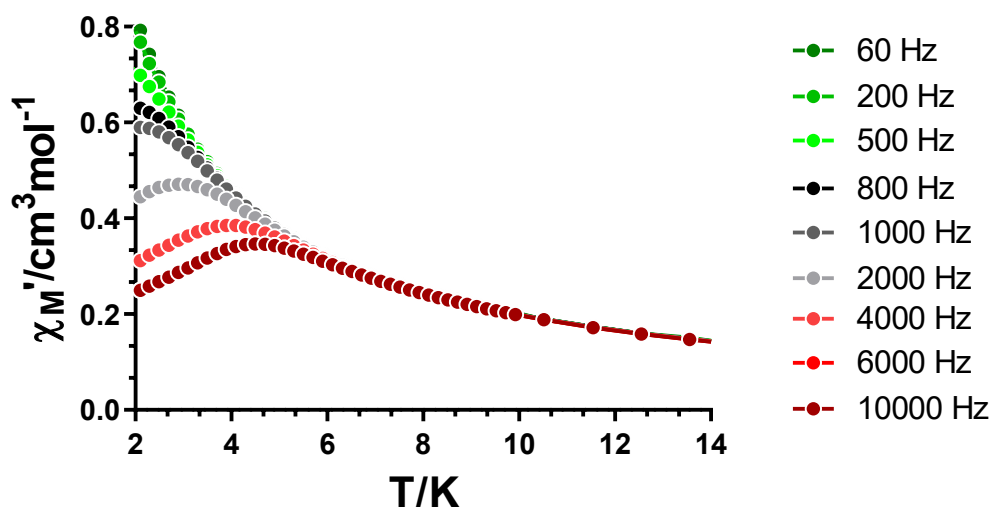

**Figure S16.-** Temperature dependence of the in phase components of the *ac* susceptibility in a *dc* applied field of 1 kOe for **1**.

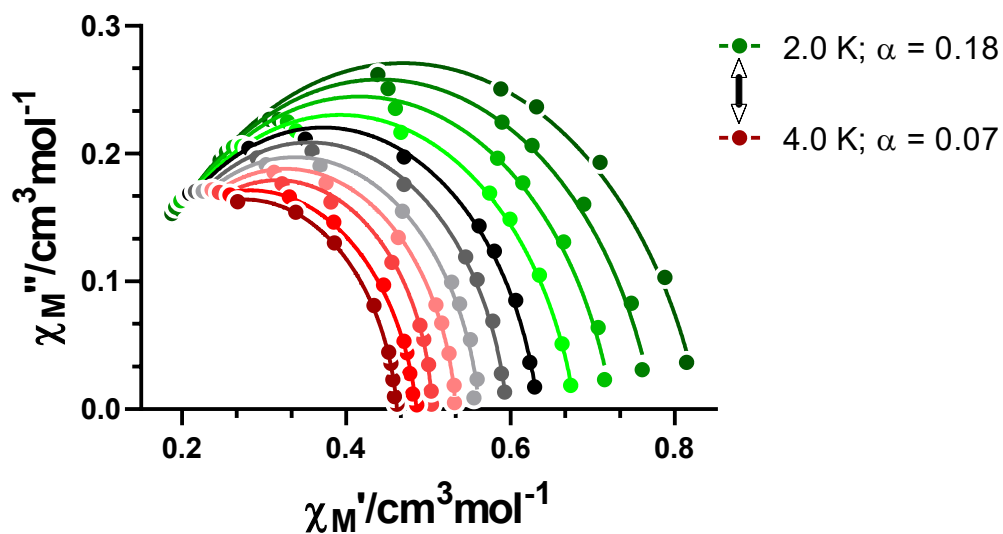

**Figure S17.-** Cole-Cole plots under 1 kOe field for 1. Solid lines represent the best fit to the generalized Debye model.

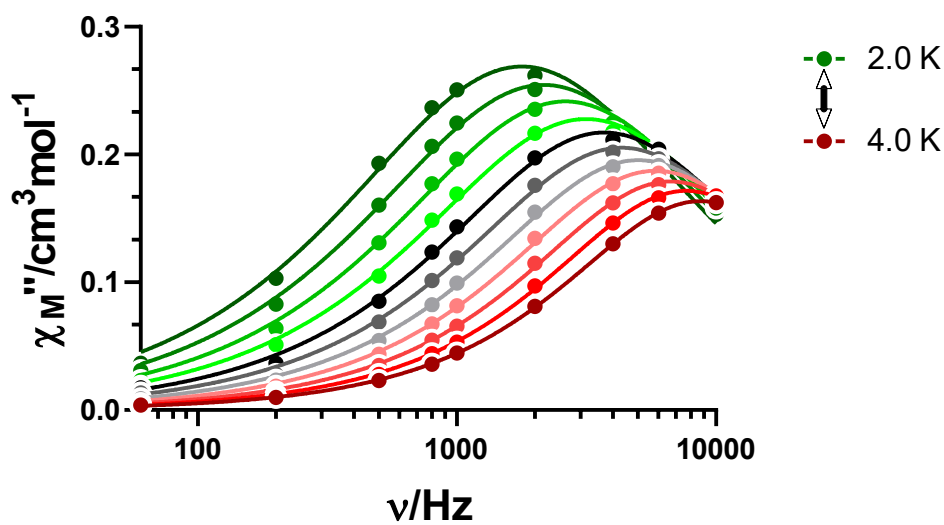

**Figure S18.-** Variable-temperature frequency dependence of the  $\chi_M''$  signal under 1 kOe applied field for 1. Solid lines represent the best fitting of the experimental data to the Debye model.

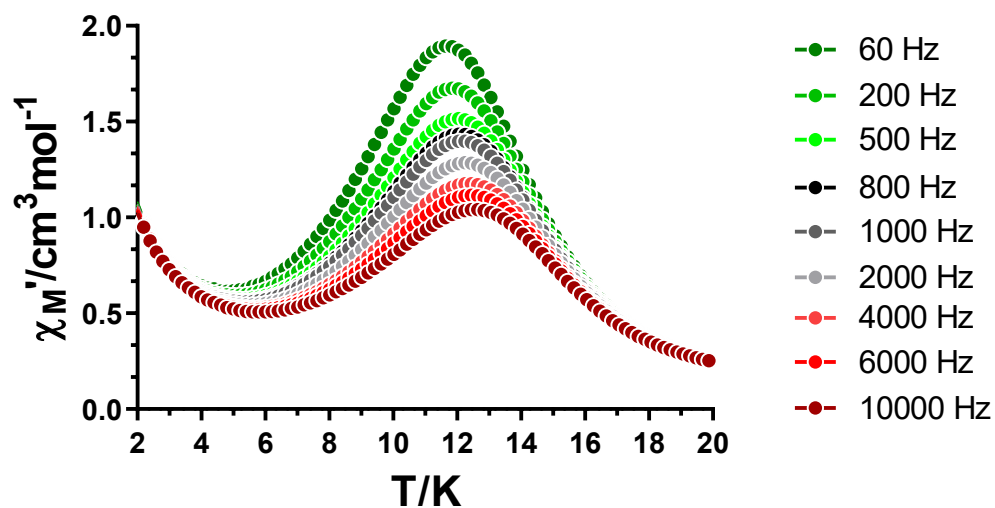

Figure S19.- Temperature dependence of the in phase components of the *ac* susceptibility in a zero applied field for **2**.

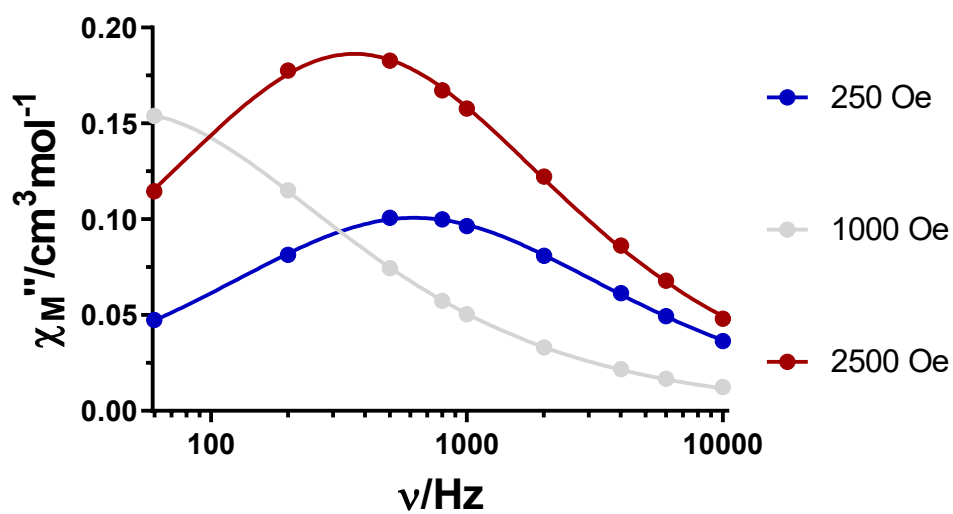

Figure S20.- Field dependence of the out-of-phase signal vs frequency at 2.8 K for **2**.

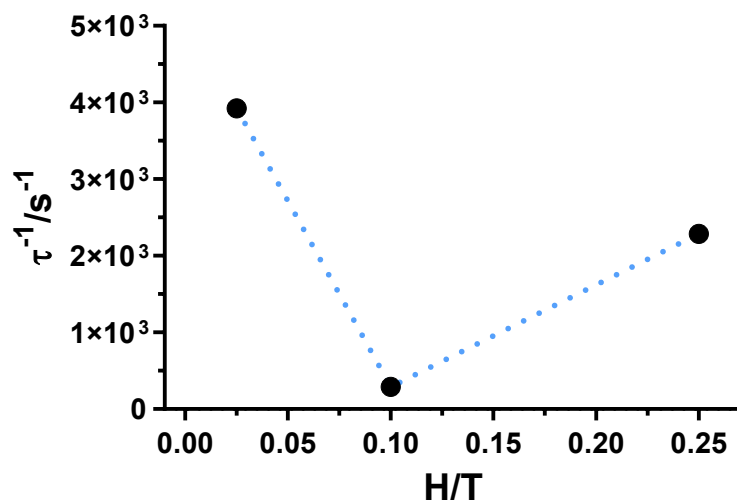

**Figure S21.-** The inverse of the relaxation times obtained at different magnetic fields at 2.8 K for **2**.  
The dashed black is a guide to the eye.

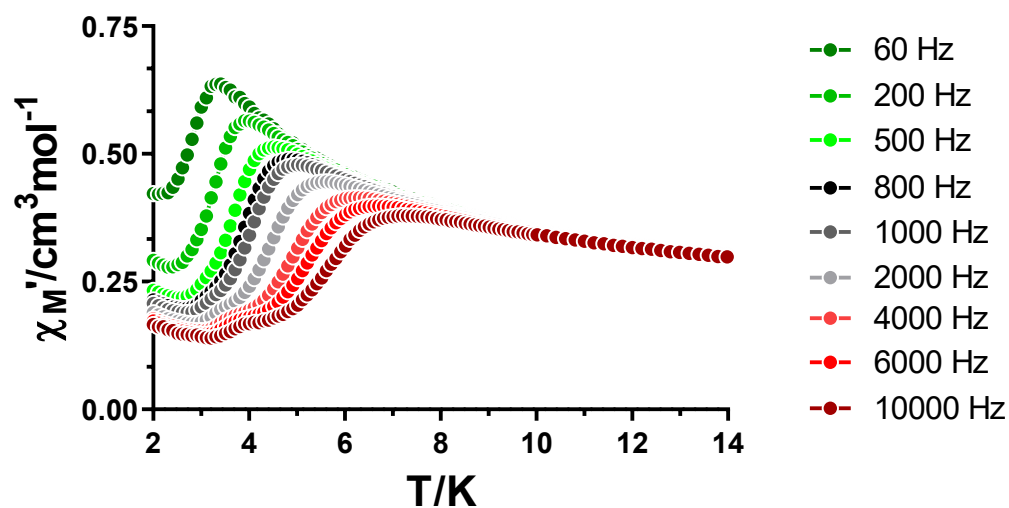

**Figure S22.-** Temperature dependence of the in phase components of the *ac* susceptibility in a *dc* applied field of 1 kOe for **2**.

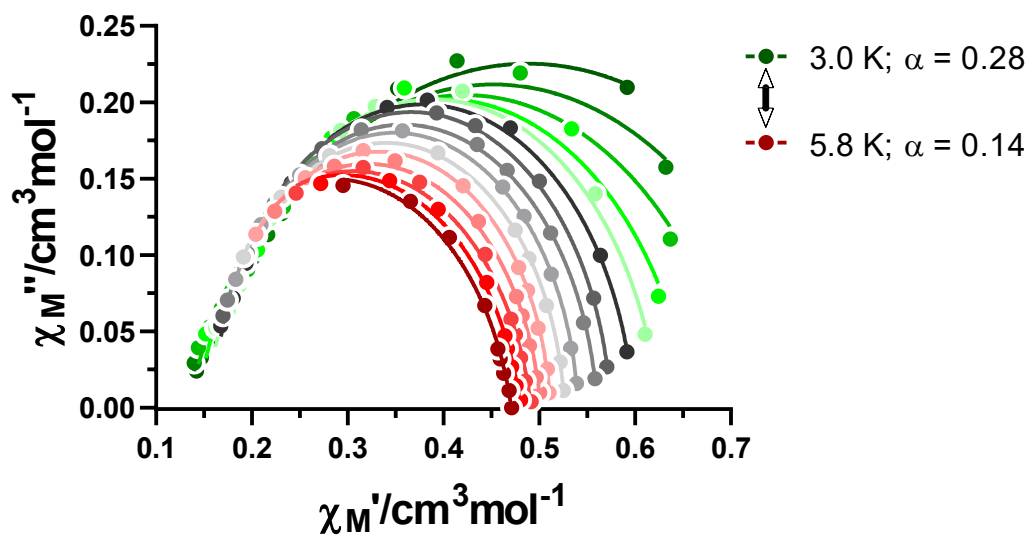

Figure S23.- Cole-Cole plots under 1 kOe field for **2**. Solid lines represent the best fit to the generalized Debye model.

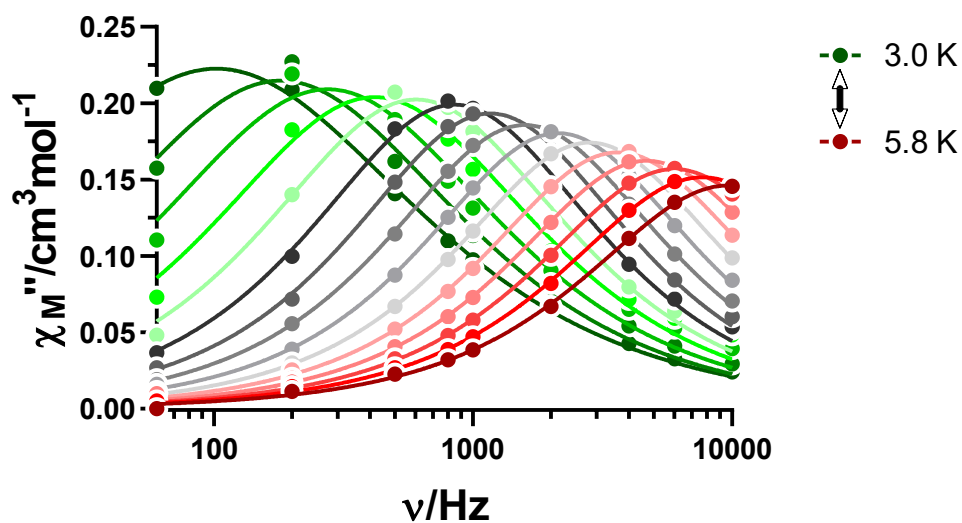

Figure S24.- Variable-temperature frequency dependence of the  $\chi_M''$  signal under 1 kOe applied field for **2**. Solid lines represent the best fitting of the experimental data to the Debye model.



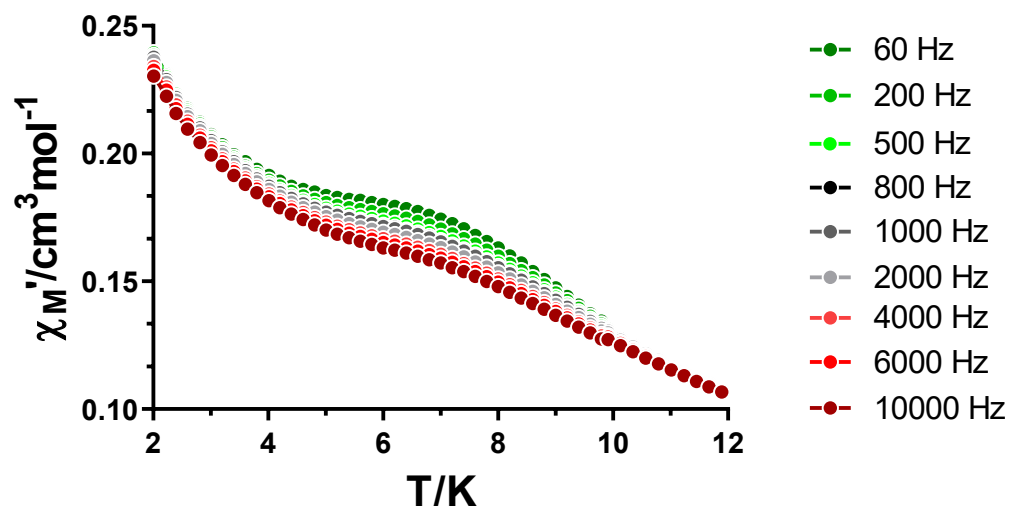

**Figure S25.-** Temperature dependence of the in phase components of the *ac* susceptibility in a zero applied field for  $2\text{Ni}$ .

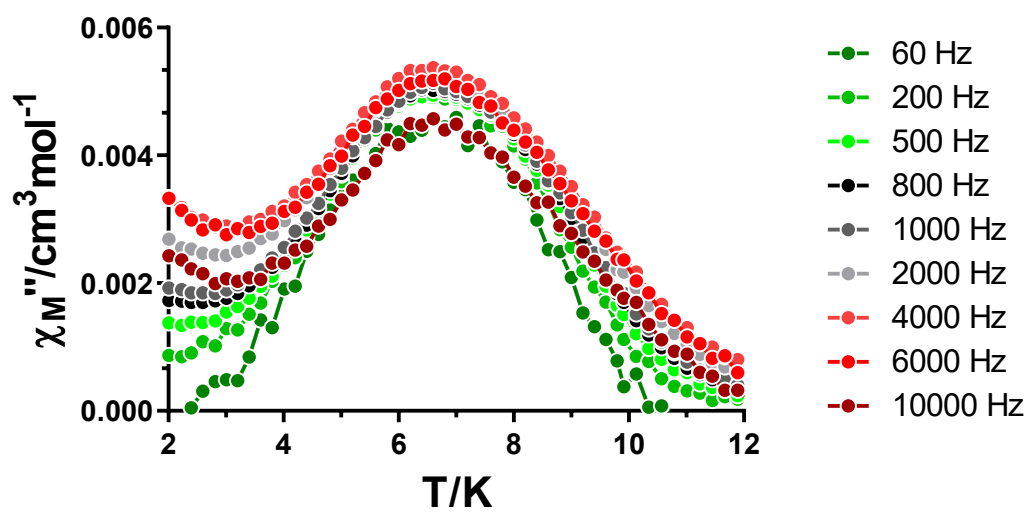

**Figure S26.-** Temperature dependence of the out of phase components of the *ac* susceptibility in a zero applied field for  $2\text{Ni}$ .

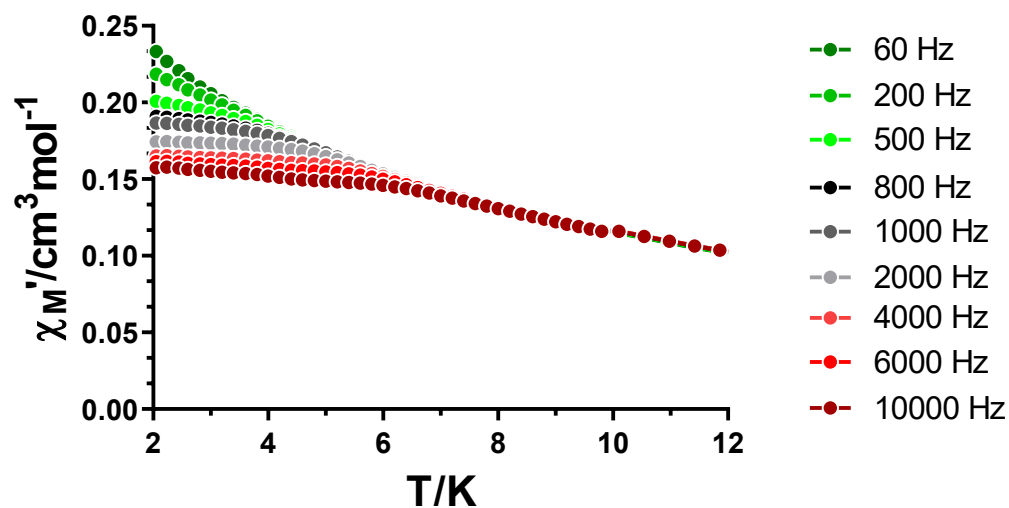

Figure S27.- Temperature dependence of the in phase components of the *ac* susceptibility in a *dc* applied field of 1 kOe for  $2_{\text{Ni}}$ .

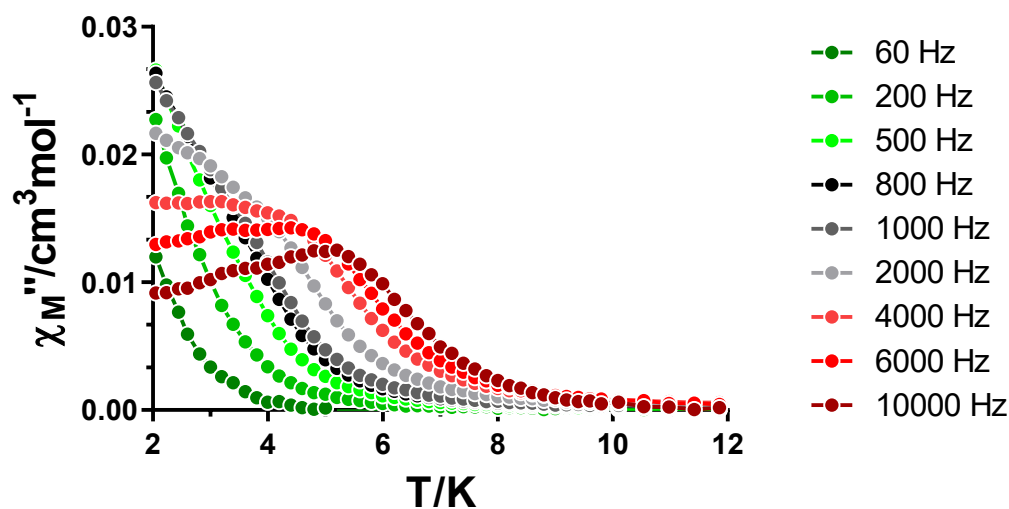

Figure S28.- Temperature dependence of the out of phase components of the *ac* susceptibility in a *dc* applied field of 1 kOe for  $2_{\text{Ni}}$ .

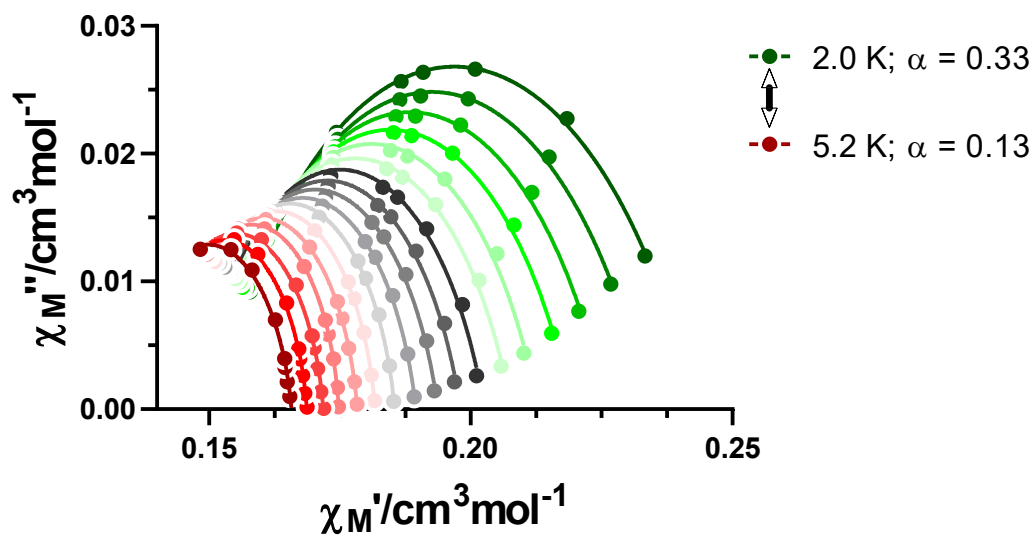

**Figure S29.-** Cole-Cole plots under 1 kOe field for  $2_{\text{Ni}}$ . Solid lines represent the best fit to the generalized Debye model.

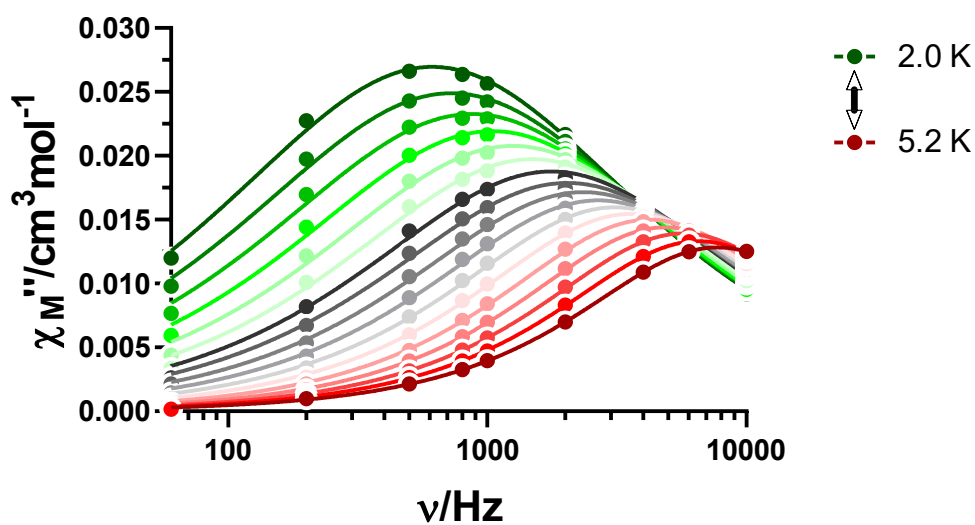

**Figure S30.-** Variable-temperature frequency dependence of the  $\chi_M''$  signal under 1 kOe applied field for  $2_{\text{Ni}}$ . Solid lines represent the best fitting of the experimental data to the Debye model.

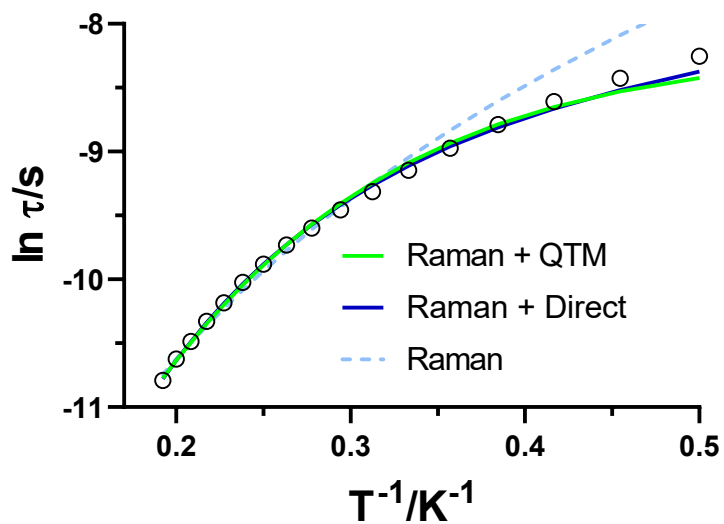

**Figure S31.-** Alternative fit of the relaxation times for  $2_{Ni}$  considering Raman and QTM mechanisms:  $B = 83(15) \text{ s}^{-1} \cdot \text{K}^{-n}$ ;  $n = 3.8(1)$  and  $\tau_{QTM} = 2.9(3) \cdot 10^{-4} \text{ s}$  ( $\tau^l = BT^n + \tau_{QTM}^{-1}$ )
